# Supplementary material for: Mitochondrial DNA copy number augments performance of A1C and oral glucose tolerance testing in the prediction of type 2 diabetes
Source: PubMed Central journal article supplement (PMC5333082; doi:10.1038/srep43203), 2017-03-02

# **Mitochondrial DNA copy number augments performance of A<sub>1</sub>C and oral glucose tolerance testing in the prediction of diabetes**

Seong Beom Cho<sup>1,†</sup>, InSong Koh<sup>2,†</sup>, Hye-Young Nam<sup>1</sup>, Jae-Pil Jeon<sup>1</sup>, Hong Kyu Lee<sup>3</sup>, and Bok-Ghee Han<sup>1,\*</sup>

<sup>1</sup>Center for Genome Science, National Research Institute of Health, KCDC, Cheongju, 28159, Korea

<sup>2</sup>Department of Physiology, School of Medicine, Hanyang University, Seoul, 04763, Korea

<sup>3</sup>Department of Internal Medicine, School of Medicine, Eulji University, Seoul, 01830, Korea

## Supplementary Method

### Quantification of mitochondrial DNA copy number

To determine relative mitochondrial DNA copy number (mtDNA-CN) of peripheral leukocyte, we applied polymerase chain reaction (PCR) using SYBR green. We used factor VIII gene as a reference we estimated mtDNA-CN using difference of threshold cycles (Ct value) between factor VIII and mitochondrial gene ND1. We selected MT-ND1 region because it has no homology with any nuclear DNA sequences in a BLAST search (Ref 16). The primer sequences of the two genes is as follows

|             |         |                              |
|-------------|---------|------------------------------|
| Factor VIII | Forward | 5'-TACCATCCAGGCTGAGGTTTAT-3' |
|             | Reverse | 5'-AAAGAGTTGTAACGCCACCATT-3' |
| ND1         | Forward | 5'-ACTACAACCCTTCGCTGACG-3'   |
|             | Reverse | 5'-GCCTAGGTTGAGGTTGACCA-3'   |

The PCR was repeated 3 times. At each time, the PCR was repeated twice. In total, 6 times of PCR on the two genes (factor VII and ND1) were performed for each sample. The reaction master mixture was composed of each primer 8uM, 2X SYBR Green PCR master mix and genomic DNA 50 ng. Initial denaturation time at 95 C was 10 minutes. Then, 40 times of thermocycling (95 C for 15 seconds and 60 C for 1 minute per cycle) was performed. The ABI Prism 7900HT sequence detection system (PE Applied Biosystems, Foster City, CA) was used for PCR.

## Supplementary Tables

**Supplementary Table S1. Prevalence of type 2 diabetes according to the percentiles of mtDNA-CN**

| mtDNA-CN category | 1 <sup>st</sup> FU |    | 2 <sup>nd</sup> FU |    | 3 <sup>rd</sup> FU |    | 4 <sup>th</sup> FU |    |
|-------------------|--------------------|----|--------------------|----|--------------------|----|--------------------|----|
|                   | NDM                | DM | NDM                | DM | NDM                | DM | NDM                | DM |
| < 25P             | 199                | 52 | 170                | 81 | 153                | 47 | 144                | 48 |
| 25P ~ 50P         | 241                | 13 | 233                | 21 | 185                | 16 | 181                | 22 |
| 50P ~ 75P         | 247                | 3  | 243                | 6  | 209                | 5  | 205                | 6  |
| >75P              | 244                | 3  | 243                | 4  | 203                | 3  | 190                | 6  |

P; percentile, FU; follow-up

**Supplementary Table S2. Size of coefficients and *p* value variables in the prediction models**

|                 | 1 <sup>st</sup> FU |                       | 2 <sup>nd</sup> FU |                        | 3 <sup>rd</sup> FU |                       | 4 <sup>th</sup> FU |                       |
|-----------------|--------------------|-----------------------|--------------------|------------------------|--------------------|-----------------------|--------------------|-----------------------|
|                 | Coef               | <i>p</i> value        | Coef               | <i>p</i> value         | Coef               | <i>p</i> value        | Coef               | <i>p</i> value        |
| <b>SBP</b>      | 0.0036             | 0.84                  | -0.01              | 0.43                   | -0.01              | 0.34                  | -0.01              | 0.30                  |
| <b>DBP</b>      | 0.02               | 0.47                  | 0.04               | 0.09                   | 0.03               | 0.07                  | 0.04               | 0.03                  |
| <b>Sex</b>      | -0.15              | 0.79                  | 0.22               | 0.68                   | 0.28               | 0.52                  | 0.33               | 0.41                  |
| <b>Age</b>      | 0.0059             | 0.83                  | -0.01              | 0.53                   | -0.003             | 0.84                  | -0.01              | 0.62                  |
| <b>A1C</b>      | 23.15              | $9.01 \times 10^{-3}$ | 43.51              | $2.57 \times 10^{-8}$  | 37.67              | $7.14 \times 10^{-8}$ | 32.60              | $4.03 \times 10^{-7}$ |
| <b>FPG</b>      | 1.63               | $3.29 \times 10^{-4}$ | 1.68               | $6.75 \times 10^{-5}$  | 1.16               | $1.27 \times 10^{-3}$ | 0.75               | 0.02                  |
| <b>GLU60</b>    | 0.23               | 0.02                  | 0.32               | $1.10 \times 10^{-3}$  | 0.23               | $8.43 \times 10^{-4}$ | 0.32               | $1.09 \times 10^{-6}$ |
| <b>GLU120</b>   | 0.75               | $1.57 \times 10^{-7}$ | 0.52               | $4.18 \times 10^{-5}$  | 0.34               | $8.83 \times 10^{-4}$ | 0.23               | 0.02                  |
| <b>mtDNA-CN</b> | -34.68             | $1.15 \times 10^{-5}$ | -51.70             | $6.22 \times 10^{-12}$ | -35.32             | $1.70 \times 10^{-9}$ | -31.36             | $1.52 \times 10^{-8}$ |
| <b>WHR</b>      | -3.57              | 0.29                  | -0.85              | 0.76                   | -2.72              | 0.25                  | -1.35              | 0.54                  |
| <b>BMI</b>      | 0.04               | 0.57                  | 0.08               | 0.16                   | 0.07               | 0.19                  | 0.08               | 0.07                  |
| <b>HTN</b>      | 0.09               | 0.85                  | 0.58               | 0.19                   | 0.76               | 0.04                  | 0.67               | 0.05                  |
| <b>DRINK</b>    | -0.30              | 0.51                  | 0.34               | 0.39                   | 0.33               | 0.33                  | 0.38               | 0.23                  |
| <b>SMOKE</b>    | 0.55               | 0.32                  | 0.27               | 0.58                   | 0.23               | 0.56                  | 0.15               | 0.69                  |
| <b>FmDm</b>     | 0.58               | 0.28                  | 0.79               | 0.09                   | 0.34               | 0.42                  | 0.09               | 0.82                  |

Coef: coefficient, SBP; systolic blood pressure, DBP; diastolic blood pressure, A1C; hemoglobin A1C, GLU60; 1 hour glucose, GLU120; 2 hour glucose, mtDNA-CN; mitochondrial copy number, WHR; waist hip ratio, BMI; body mass index, HTN; hypertension, FmDm; family history of diabetes.

## **Supplementary Figure Legend**

**Supplementary Figure S1.** Histogram of original and log-transformed mtDNA-CN

**Supplementary Figure S2.** Boxplot of log-transformed mtDNA-CN in nondiabetes and diabetes group of all follow-ups.

# Supplementary Figures

## Supplementary Figure S1

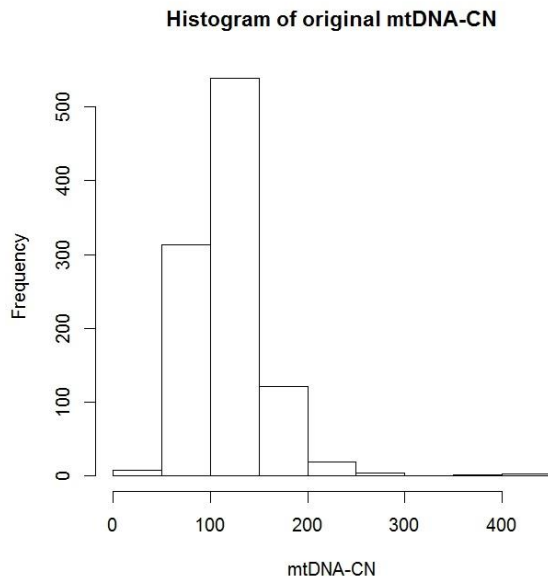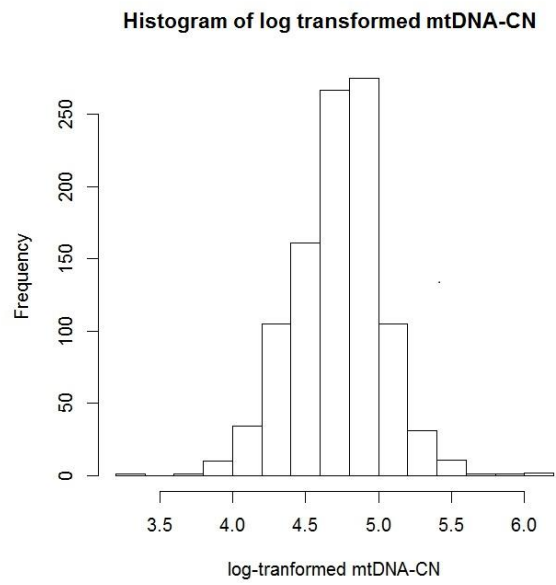

## Supplementary Figure S2

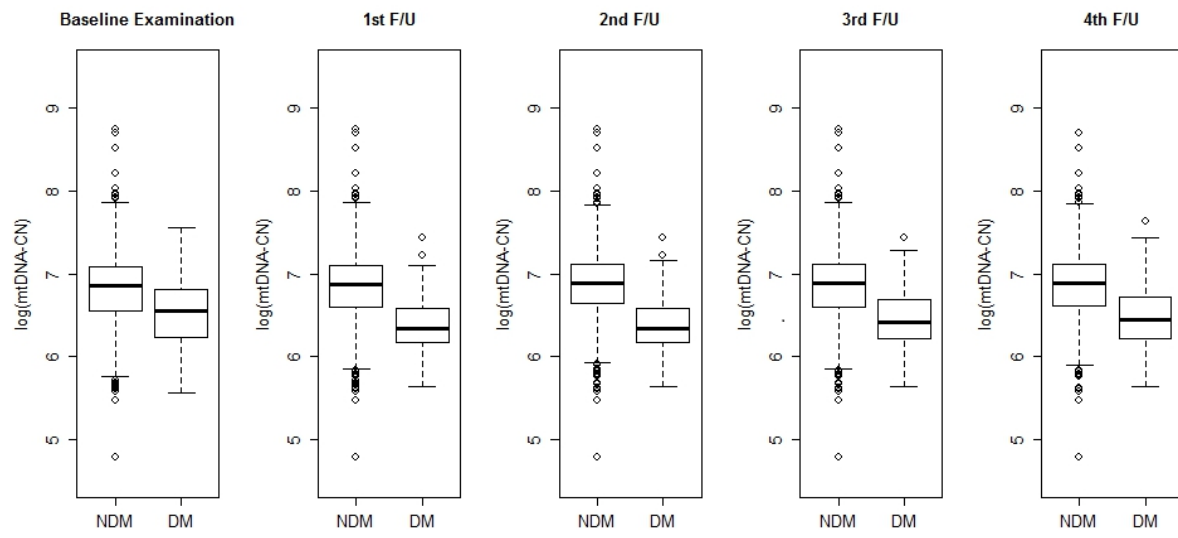

Supplement: srep43203-s1.pdf [file srep43203-s1.pdf]
